# Supplementary material for: Substantial exchange coupling for {Mo–NCS–M} combination: illustration for 1-D [{Mo(NCS)6}{NiL}2(NCS)]n
Source: Royal Society of Chemistry journal article supplement (doi:10.1039/c0cc02498h), 2010-01-01
Supplement: c0cc02498h.pdf [file c0cc02498h.pdf]

## Supporting Information

---

### Substantial exchange coupling for {Mo-NCS-M} combination:

#### Illustration for 1-D $[\{\text{Mo}(\text{NCS})_6\}\{\text{NiL}\}_2(\text{NCS})]_n$ .

Maliheh Mousavi,<sup>1,2</sup> Virgine Béreau,<sup>1,2</sup> Cédric Desplanches,<sup>3</sup> Carine Duhayon,<sup>1,2</sup> Jean-Pascal Sutter,<sup>\*1,2</sup>

<sup>1</sup> CNRS ; LCC (Laboratoire de Chimie de Coordination) ; 205, route de Narbonne, F-31077 Toulouse, France

<sup>2</sup> Université de Toulouse ; UPS, INPT ; LCC ; F-31077 Toulouse, France

<sup>3</sup> CNRS, Université de Bordeaux, ICMCB, 87 avenue du Dr A. Schweitzer, Pessac, F-33608, France

\* e-mail: sutter@lcc-toulouse.fr

**Figure SI1.** ORTEP view of the molecular structure of  $(\text{PPh}_4)_3\{\text{Mo}(\text{NCS})_6\}.2\text{MeCN}$ , **1**. (thermal ellipsoids set at 30 % of probability).

**Table SI1.** Selected bond lengths and angles for **1**.

**Figure SI2.** Crystal packing for **1**.

**Figure SI3.** ORTEP view of the molecular structure of  $[\{\text{Mo}(\text{NCS})_6\}\{\text{NiL}^2\}_2(\text{NCS})]_n.\text{MeCN}$ , **2**. (thermal ellipsoids set at 30 % of probability).

**Table SI2.** Selected bond lengths and angles for **2**.

**Figure SI4.** ORTEP view of the molecular structure of  $[\{\text{Cr}(\text{NCS})_6\}\{\text{NiL}^2\}_2(\text{NCS})]_n.\text{MeCN}$ , **3**. (thermal ellipsoids set at 30 % of probability).

**Table SI3.** Selected bond lengths and angles for **3**.

**Table SI4.** Spin density distribution for  $\{\text{Mo}(\text{NCS})_6\}^{3-}$  in **1** deduced from DFT calculations.

**Table SI5.** Spin distribution obtained for  $\{\text{Mo}(\text{NCS})_6\}^{3-}$  at crystallographic coordinates reported for  $\text{K}_3\{\text{MoNCS}\}_6$ .

Full reference for Gaussian03.

**Figure SI5.** Experimental and calculated (—)  $\chi_{\text{M}}T$  versus  $T$ , and  $M$  versus  $H$  for  $(\text{PPh}_4)_3\{\text{Mo}(\text{NCS})_6\}.2\text{MeCN}$ , **1**.

*Supporting Information*

**Figure S11.** ORTEP view of the molecular structure of  $(\text{PPh}_4)_3\{\text{Mo}(\text{NCS})_6\} \cdot 2\text{MeCN}$ , **1**. (thermal ellipsoids set at 30 % of probability)

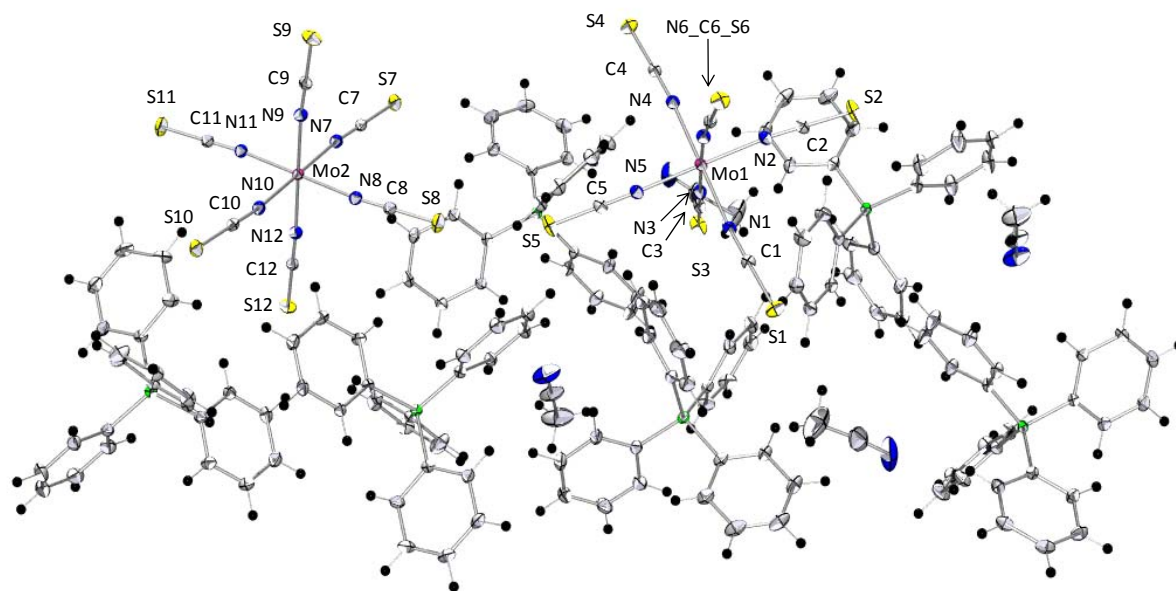

## Supporting Information

**Table SII.** Selected bond lengths and angles for **1**.

**DISTANCES (Å)**

|     |     |             |     |     |             |
|-----|-----|-------------|-----|-----|-------------|
| S1  | C1  | 1.6272(16)Å | S2  | C2  | 1.6264(17)Å |
| S3  | C3  | 1.6198(16)Å | S4  | C4  | 1.6273(16)Å |
| S5  | C5  | 1.6217(17)Å | S6  | C6  | 1.6200(17)Å |
| S7  | C7  | 1.6217(17)Å | S8  | C8  | 1.6178(17)Å |
| S9  | C9  | 1.6225(16)Å | S10 | C10 | 1.6212(17)Å |
| S11 | C11 | 1.6172(17)Å | S12 | C12 | 1.6163(16)Å |
| N1  | C1  | 1.161(2)Å   | N1  | Mo1 | 2.1135(13)Å |
| N2  | C2  | 1.163(2)Å   | N2  | Mo1 | 2.1061(14)Å |
| N3  | C3  | 1.163(2)Å   | N3  | Mo1 | 2.0948(14)Å |
| N4  | C4  | 1.161(2)Å   | N4  | Mo1 | 2.1110(13)Å |
| N5  | C5  | 1.164(2)Å   | N5  | Mo1 | 2.1079(14)Å |
| N6  | C6  | 1.163(2)Å   | N6  | Mo1 | 2.0919(14)Å |
| N7  | C7  | 1.165(2)Å   | N7  | Mo2 | 2.1018(15)Å |
| N8  | C8  | 1.163(2)Å   | N8  | Mo2 | 2.0976(14)Å |
| N9  | C9  | 1.156(2)Å   | N9  | Mo2 | 2.0923(14)Å |
| N10 | C10 | 1.164(2)Å   | N10 | Mo2 | 2.1050(14)Å |
| N11 | C11 | 1.165(2)Å   | N11 | Mo2 | 2.1003(14)Å |
| N12 | C12 | 1.165(2)Å   | N12 | Mo2 | 2.0919(14)Å |

**ANGLES (°)**

|    |    |     |             |    |    |     |             |
|----|----|-----|-------------|----|----|-----|-------------|
| C1 | N1 | Mo1 | 175.15(13)° | C2 | N2 | Mo1 | 173.72(12)° |
| C3 | N3 | Mo1 | 179.55(13)° | C4 | N4 | Mo1 | 174.39(13)° |
| C5 | N5 | Mo1 | 178.51(12)° | C6 | N6 | Mo1 | 172.17(13)° |
| C7 | N7 | Mo2 | 172.30(13)° | C8 | N8 | Mo2 | 172.79(13)° |

|     |     |     |             |     |     |     |             |
|-----|-----|-----|-------------|-----|-----|-----|-------------|
| C9  | N9  | Mo2 | 174.42(13)° | C10 | N10 | Mo2 | 172.45(12)° |
| C11 | N11 | Mo2 | 173.11(13)° | C12 | N12 | Mo2 | 176.25(13)° |
| S1  | C1  | N1  | 179.42(16)° | S2  | C2  | N2  | 179.06(15)° |
| S3  | C3  | N3  | 179.48(15)° | S4  | C4  | N4  | 179.21(15)° |
| S5  | C5  | N5  | 179.70(15)° | S6  | C6  | N6  | 179.07(14)° |
| S7  | C7  | N7  | 179.66(13)° | S8  | C8  | N8  | 179.77(16)° |
| S9  | C9  | N9  | 178.99(16)° | S10 | C10 | N10 | 179.50(13)° |
| S11 | C11 | N11 | 179.70(15)° | S12 | C12 | N12 | 179.16(16)° |
| N1  | Mo1 | N2  | 88.95(5)°   | N1  | Mo1 | N3  | 90.72(5)°   |
| N2  | Mo1 | N3  | 90.45(5)°   | N1  | Mo1 | N4  | 179.21(7)°  |
| N2  | Mo1 | N4  | 90.96(5)°   | N3  | Mo1 | N4  | 88.50(5)°   |
| N1  | Mo1 | N5  | 90.47(5)°   | N2  | Mo1 | N5  | 179.10(6)°  |
| N3  | Mo1 | N5  | 90.25(5)°   | N4  | Mo1 | N5  | 89.63(5)°   |
| N1  | Mo1 | N6  | 89.10(5)°   | N2  | Mo1 | N6  | 88.34(6)°   |
| N3  | Mo1 | N6  | 178.78(7)°  | N4  | Mo1 | N6  | 91.68(5)°   |
| N5  | Mo1 | N6  | 90.95(6)°   | N7  | Mo2 | N8  | 88.45(5)°   |
| N7  | Mo2 | N9  | 89.82(6)°   | N8  | Mo2 | N9  | 88.84(5)°   |
| N7  | Mo2 | N10 | 179.81(6)°  | N8  | Mo2 | N10 | 91.71(5)°   |
| N9  | Mo2 | N10 | 90.08(6)°   | N7  | Mo2 | N11 | 91.67(5)°   |
| N8  | Mo2 | N11 | 179.82(6)°  | N9  | Mo2 | N11 | 91.29(5)°   |
| N10 | Mo2 | N11 | 88.17(5)°   | N7  | Mo2 | N12 | 90.18(6)°   |
| N8  | Mo2 | N12 | 90.79(5)°   | N9  | Mo2 | N12 | 179.63(6)°  |
| N10 | Mo2 | N12 | 89.92(6)°   | N11 | Mo2 | N12 | 89.08(5)°   |

*Supporting Information*

**Figure SI2.** Crystal packing for **1**.

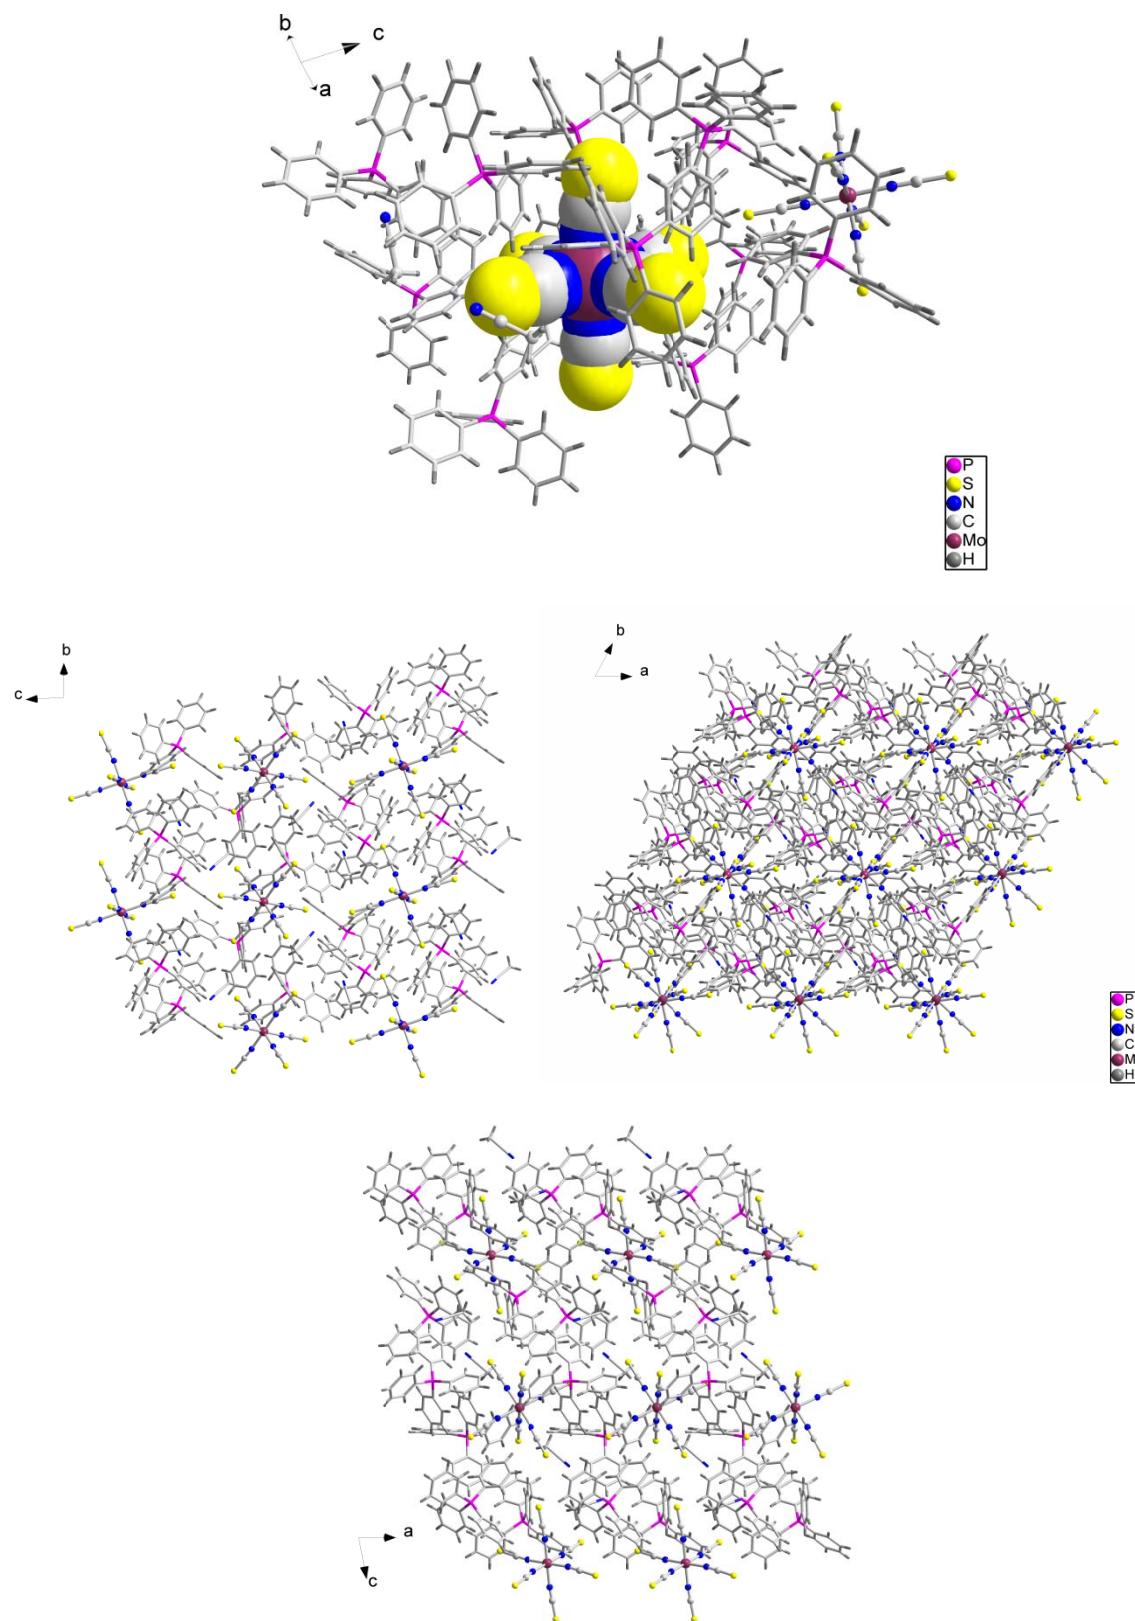

## Supporting Information

**Figure SI3.** ORTEP view of the molecular structure of  $[\{\text{Mo}(\text{NCS})_6\}\{\text{NiL}^2\}_2(\text{NCS})_n]\cdot\text{MeCN}$ , **2**. (thermal ellipsoids set at 30 % of probability).

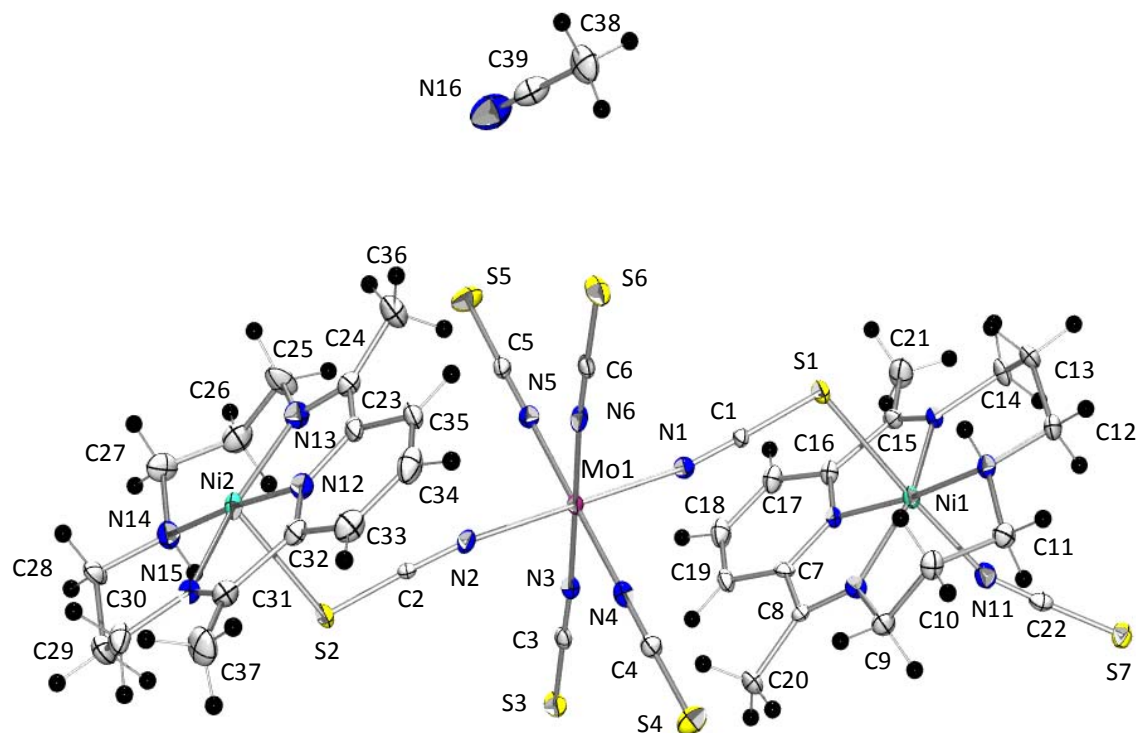

**Table SI2.** Selected bond lengths and angles for **2**.

### DISTANCES (Å)

|     |     |           |     |             |           |
|-----|-----|-----------|-----|-------------|-----------|
| Mo1 | N1  | 2.095(5)Å | Mo1 | N2          | 2.086(5)Å |
| Mo1 | N3  | 2.066(6)Å | Mo1 | N4          | 2.086(6)Å |
| Mo1 | N5  | 2.075(6)Å | Mo1 | N6          | 2.076(6)Å |
| Ni1 | N7  | 1.933(5)Å | Ni1 | N8          | 2.039(5)Å |
| Ni1 | N9  | 1.989(5)Å | Ni1 | N10         | 2.057(5)Å |
| Ni1 | N11 | 2.072(7)Å | Ni1 | S1          | 2.619(2)Å |
| Ni2 | N12 | 1.933(6)Å | Ni2 | N13         | 2.004(6)Å |
| Ni2 | N14 | 1.996(6)Å | Ni2 | N15         | 2.099(6)Å |
| Ni2 | S2  | 2.534(2)Å | Ni2 | S7<br>2_645 | 2.519(2)Å |
| C1  | N1  | 1.136(7)Å | C1  | S1          | 1.628(6)Å |
| C2  | N2  | 1.154(7)Å | C2  | S2          | 1.616(6)Å |
| C3  | N3  | 1.160(9)Å | C3  | S3          | 1.612(8)Å |

|     |    |           |     |     |           |
|-----|----|-----------|-----|-----|-----------|
| C4  | N4 | 1.153(8)Å | C4  | S4  | 1.606(7)Å |
| C5  | N5 | 1.148(8)Å | C5  | S5  | 1.613(7)Å |
| C6  | N6 | 1.134(9)Å | C6  | S6  | 1.619(8)Å |
| C22 | S7 | 1.637(7)Å | C22 | N11 | 1.422(9)Å |

### ANGLES (°)

|     |     |    |           |              |    |     |           |
|-----|-----|----|-----------|--------------|----|-----|-----------|
| N2  | C2  | S2 | 177.8(6)° | N1           | C1 | S1  | 178.2(6)° |
| N4  | C4  | S4 | 178.9(7)° | N3           | C3 | S3  | 177.8(6)° |
| N6  | C6  | S6 | 179.2(7)° | N5           | C5 | S5  | 178.5(6)° |
| N11 | C22 | S7 | 177.5(6)° | Mo1          | N1 | C1  | 166.5(6)° |
| Mo1 | N2  | C2 | 168.6(6)° | Mo1          | N3 | C3  | 172.6(5)° |
| Mo1 | N4  | C4 | 178.0(6)° | Mo1          | N5 | C5  | 175.9(6)° |
| Mo1 | N6  | C6 | 173.5(5)° | Ni2          | S2 | C2  | 104.6(2)° |
| Ni1 | S1  | C1 | 105.8(2)° | Ni2<br>2_655 | S7 | C22 | 103.9(2)° |

## Supporting Information

**Figure SI4.** ORTEP view of the molecular structure of  $[\{\text{Cr}(\text{NCS})_6\}\{\text{NiL}^2\}_2(\text{NCS})]_n \cdot \text{MeCN}$ , **3**. (thermal ellipsoids set at 30 % of probability).

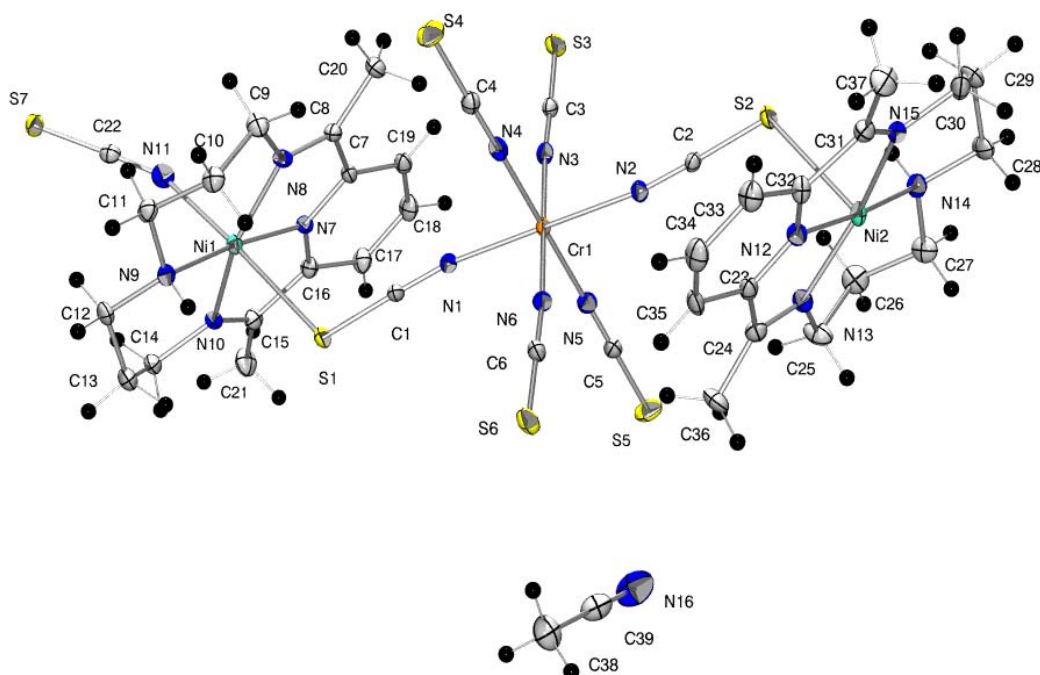

**Table SI3.** Selected bond lengths and angles for **3**.

### DISTANCES (Å)

|     |     |             |     |             |             |
|-----|-----|-------------|-----|-------------|-------------|
| Cr1 | N1  | 2.017(3)Å   | Cr1 | N2          | 2.015(3)Å   |
| Cr1 | N3  | 2.008(3)Å   | Cr1 | N4          | 2.005(3)Å   |
| Cr1 | N5  | 2.000(3)Å   | Cr1 | N6          | 1.987(3)Å   |
| Ni1 | N7  | 1.939(3)Å   | Ni1 | N8          | 2.039(3)Å   |
| Ni1 | N9  | 2.008(3)Å   | Ni1 | N10         | 2.062(3)Å   |
| Ni1 | N11 | 2.088(4)Å   | Ni1 | S1          | 2.6432(10)Å |
| Ni2 | N12 | 1.936(3)Å   | Ni2 | N13         | 2.010(3)Å   |
| Ni2 | N14 | 2.009(3)Å   | Ni2 | N15         | 2.101(3)Å   |
| Ni2 | S2  | 2.5534(10)Å | Ni2 | S7<br>2_645 | 2.5394(10)Å |
| C1  | N1  | 1.158(4)Å   | C1  | S1          | 1.638(3)Å   |
| C2  | N2  | 1.149(4)Å   | C2  | S2          | 1.643(3)Å   |
| C3  | N3  | 1.147(4)Å   | C3  | S3          | 1.622(3)Å   |
| C4  | N4  | 1.129(5)Å   | C4  | S4          | 1.640(4)Å   |

|    |    |           |    |    |           |
|----|----|-----------|----|----|-----------|
| C5 | N5 | 1.150(5)Å | C5 | S5 | 1.617(4)Å |
| C6 | N6 | 1.156(5)Å | C6 | S6 | 1.631(4)Å |

### ANGLES (°)

|     |             |     |             |     |     |     |             |
|-----|-------------|-----|-------------|-----|-----|-----|-------------|
| N2  | C2          | S2  | 178.1(3)°   | N1  | C1  | S1  | 178.3(3)°   |
| N4  | C4          | S4  | 179.3(3)°   | N3  | C3  | S3  | 177.9(3)°   |
| N6  | C6          | S6  | 178.8(4)°   | N5  | C5  | S5  | 178.5(4)°   |
| Cr1 | N2          | C2  | 167.3(3)°   | Cr1 | N1  | C1  | 165.1(3)°   |
| Cr1 | N4          | C4  | 176.9(3)°   | Cr1 | N3  | C3  | 171.8(3)°   |
| Cr1 | N6          | C6  | 171.9(3)°   | Cr1 | N5  | C5  | 174.5(3)°   |
| Ni1 | S1          | C1  | 106.33(11)° | Ni2 | S2  | C2  | 105.44(12)° |
| Ni2 | S7<br>2_655 | C22 | 103.37(12)° | Ni1 | N11 | C22 | 157.8(3)°   |

## Supporting Information

**Table SI4.** Spin density distribution for  $\{\text{Mo}(\text{NCS})_6\}^{3-}$  in **1** deduced from DFT calculations.

| Atom (structure <sup>1</sup> label) | Atom (DFT labeling) | Spin density |
|-------------------------------------|---------------------|--------------|
| Mo1                                 | Mo1                 | 2.521467     |
| N1                                  | N3                  | -0.075417    |
| C1                                  | C2                  | 0.085085     |
| S1                                  | S1                  | 0.064320     |
| N2                                  | N5                  | -0.076352    |
| C2                                  | C10                 | 0.087830     |
| S2                                  | S15                 | 0.065893     |
| N3                                  | N6                  | -0.078432    |
| C3                                  | C11                 | 0.094175     |
| S3                                  | S16                 | 0.069746     |
| N4                                  | N7                  | -0.076581    |
| C4                                  | C12                 | 0.088087     |
| S4                                  | S17                 | 0.064454     |
| N5                                  | N8                  | -0.077863    |
| C5                                  | C13                 | 0.090577     |
| S5                                  | S18                 | 0.066542     |
| N6                                  | N9                  | -0.078202    |
| C6                                  | C14                 | 0.094561     |
| S6                                  | S19                 | 0.070111     |
| Mo2                                 | Mo2                 | 2.509164     |
| N7                                  | N3                  | -0.078071    |
| C7                                  | C2                  | 0.091139     |
| S7                                  | S1                  | 0.066833     |
| N8                                  | N5                  | -0.077622    |
| C8                                  | C10                 | 0.091322     |
| S8                                  | S15                 | 0.068098     |
| N9                                  | N6                  | -0.077002    |
| C9                                  | C11                 | 0.092689     |
| S9                                  | N16                 | 0.068006     |
| N10                                 | N7                  | -0.077303    |
| C10                                 | C12                 | 0.089451     |
| S10                                 | N17                 | 0.066049     |
| N11                                 | N8                  | -0.077923    |
| C11                                 | C13                 | 0.091415     |
| S11                                 | N18                 | 0.067781     |
| N12                                 | N9                  | -0.079453    |
| C12                                 | C14                 | 0.095484     |
| S12                                 | N19                 | 0.069942     |

<sup>1</sup> Label as in Figure SI1



## Supporting Information

**Table S15.** Spin distribution obtained for  $\{\text{Mo}(\text{NCS})_6\}^{3-}$  at crystallographic coordinates reported for  $\text{K}_3\{\text{MoNCS}\}_6$ .<sup>1</sup>

| Atom (structure <sup>1</sup> label) | Atom (DFT labeling) | Spin density          |
|-------------------------------------|---------------------|-----------------------|
| Mo                                  | Mo                  | 2.480367              |
| N1                                  | N6                  | -0.084097             |
| C1                                  | C1                  | 0.096178              |
| S1                                  | S10                 | 0.072329              |
| N2                                  | N7                  | -0.086545             |
| C2                                  | C2                  | 0.126992              |
| S2                                  | S11                 | 0.071795              |
| N3                                  | N14 / N8            | -0.076586 / -0.076564 |
| C3                                  | C16 / C3            | 0.097820 / 0.097787   |
| S3                                  | S18 / S12           | 0.070462 / 0.070430   |
| N4                                  | N15 / N9            | -0.076366 / -0.076364 |
| C4                                  | C17 / C4            | 0.085390 / 0.085401   |
| S4                                  | S19 / S13           | 0.060787 / 0.060785   |

<sup>1</sup> The atom labeling refers to Figure 1 in J. R. Knox and K. Eriks, *Inorg. Chem.*, **1968**, 7, 84-90.

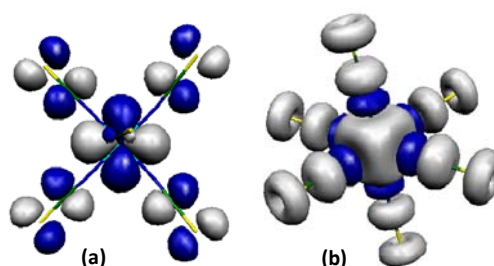

(a) One of the three HOMOs, and (b) distribution of spin density (positive in grey) and negative in (blue)



## Supporting Information

---

Full reference for Gaussian03:

**Gaussian 03, Revision D.01**, M. J. Frisch, G. W. Trucks, H. B. Schlegel, G. E. Scuseria, M. A. Robb, J. R. Cheeseman, J. A. Montgomery, Jr., T. Vreven, K. N. Kudin, J. C. Burant, J. M. Millam, S. S. Iyengar, J. Tomasi, V. Barone, B. Mennucci, M. Cossi, G. Scalmani, N. Rega, G. A. Petersson, H. Nakatsuji, M. Hada, M. Ehara, K. Toyota, R. Fukuda, J. Hasegawa, M. Ishida, T. Nakajima, Y. Honda, O. Kitao, H. Nakai, M. Klene, X. Li, J. E. Knox, H. P. Hratchian, J. B. Cross, C. Adamo, J. Jaramillo, R. Gomperts, R. E. Stratmann, O. Yazyev, A. J. Austin, R. Cammi, C. Pomelli, J. W. Ochterski, P. Y. Ayala, K. Morokuma, G. A. Voth, P. Salvador, J. J. Dannenberg, V. G. Zakrzewski, S. Dapprich, A. D. Daniels, M. C. Strain, O. Farkas, D. K. Malick, A. D. Rabuck, K. Raghavachari, J. B. Foresman, J. V. Ortiz, Q. Cui, A. G. Baboul, S. Clifford, J. Cioslowski, B. B. Stefanov, G. Liu, A. Liashenko, P. Piskorz, I. Komaromi, R. L. Martin, D. J. Fox, T. Keith, M. A. Al-Laham, C. Y. Peng, A. Nanayakkara, M. Challacombe, P. M. W. Gill, B. Johnson, W. Chen, M. W. Wong, C. Gonzalez, and J. A. Pople, *Gaussian, Inc., Pittsburgh PA, 2003*.

## Supporting Information

**Figure SI5.** Experimental and calculated (—)  $\chi_M T$  versus  $T$ , and  $M$  versus  $H$  for  $(\text{PPh}_4)_3\{\text{Mo}(\text{NCS})_6\} \cdot 2\text{MeCN}$ , **1**.

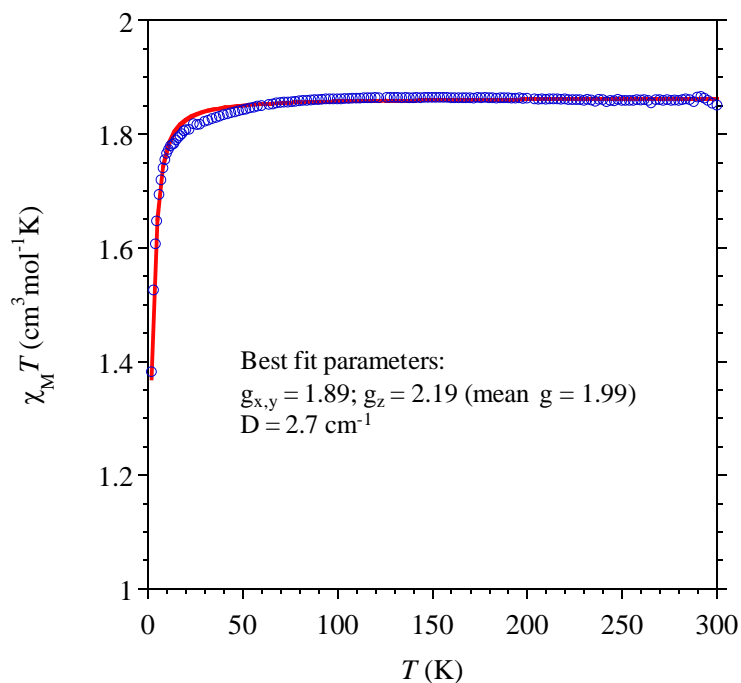

Modeling has been performed with the expression of  $\chi_M$  susceptibility for an ion with  $d^3$  configuration in axially distorted octahedral surroundings given by O. Kahn *Molecular Magnetism*, Wiley-VCH, Weinheim **1993**.
